# Supplementary material for: Developmental Regression in Children: A Scoping Review of Definitions and Measures
Source: Research Square preprint supplement (doi:10.21203/rs.3.rs-3977549/v1), 2024-03-11
Supplement: Supplementary file 1 [file ff69dc548c799ba6501b86cf.docx]

**Supplementary material**

Search strategy Ovid Medline

| 1. | developmental disabilities/ |
| --- | --- |
| 2. | neurodevelopmental disorders/ |
| 3. | Child Development Disorders, Pervasive/ |
| 4. | Autistic Disorder/ |
| 5. | 1 or 2 or 3 or 4 |
| 6. | (regress* or deteriorat* or decline or loss or setback).ti,ab. |
| 7. | (regress* adj1 (poisson or linear or univar* or multi* or adjust* or unadjust* or logis*)).ti,ab. |
| 8. | (regress* adj1 (caudal or spinal)).ti,ab. |
| 9. | 5 and 6 |
| 10. | 7 or 8 |
| 11. | 9 not 10 |
| 12. | ((neurocog* or intel* or cognitive) adj1 (regress* or decline* or deteriorat*)).ti,ab. |
| 13. | limit 12 to "all child (0 to 18 years)" |
| 14. | ((neurodevelopment* or autis*) adj1 (regress* or deteriorat* or decline or loss* or setback*)).ti,ab. |
| 15. | ((motor or psychomotor) adj1 (regress* or deteriorat* or decline or loss* or setback*)).ti,ab. |
| 16. | ((social* or language* or verbal or adaptive or behaviour*) adj1 (regress* or deteriorat* or decline or loss* or setback*)).ti,ab. |
| 17. | ((skill* or milestone* or ability*) adj1 (loss* or decline or regress* or deteriorat*)).ti,ab. |
| 18. | 14 or 15 or 16 or 17 |
| 19. | 11 or 13 or 18 |
| 20. | limit 19 to "all child (0 to 18 years)" |

Measures used and author conflicts

| Author/S | Regression Measure | Conflict |
| --- | --- | --- |
| 1 Richler, Luyster, Lord, Goldberg, Volkmar et al | ADIR | ADIR (Lord, Rutter, Le Couteur 1994)  None disclosed |
| 2 Backes et al | ADIR | None disclosed |
| 3 Baird, Pickles et al | ADIR | Expert group included Le Couteur, Lord and Rutter  None disclosed |
| 4 Baird et al | ADIR | None disclosed |
| 5 Boorstein H | ADIR | None disclosed |
| 6 Goldberg et al | ADIR and RSF | Goldberg developed RSF. Lord assisted with draft |
| 7 Boterberg et al | ADIR | None disclosed |
| 8 Fang et al | ADIR |  |
| 9 Fombonne & Chakrabarti | ADIR |  |
| 10 Gagnon et al | ADIR |  |
| 11 Giannotti et al | ADIR |  |
| 12 Giannotti et al | ADIR |  |
| 13 Goin-Kochel et al | ADIR |  |
| 14 Goin | ADIR |  |
| 15 Goin-Kochel et al | ADIR |  |
| 16 Goin Kochel et al | ADIR |  |
| 17 Goldberg et al | ADIR |  |
| 18 Hansen et al | ADIR |  |
| 19 Lord, Shulman, DiLavore | ADIR and home video | Lord |
| 20 Heung K | ADIR and RVI |  |
| 21 Lainhart et al | ADIR |  |
| 22 Maestro et al | ADIR |  |
| 23 Martin-Borreguero et al | ADIR |  |
| 24 Meilleur and Fombonne | ADIR |  |
| 25 Mire et al | ADIR |  |
| 26 Mire et al | ADIR |  |
| 27 Ozonoff et al | ADIR, home video |  |
| 28 Ozonoff et al | ADIR |  |
| 29 Ozonoff et al | ADIR |  |
| 30 Ozonoff et al | ADIR |  |
| 31 Pardo et al | ADIR |  |
| 32 Parr et al | ADIR |  |
| 33 Pickles et al | ADIR |  |
| 34 Plaza-Diaz et al | ADIR |  |
| 35 Prescott et al | ADIR |  |
| 36 Scot et al | ADIR |  |
| 37 Shumway et al | ADIR |  |
| 38 Werner & Dawson | ADIR and home video |  |
| 39 Werner | ADIR and EDI |  |
| 40 Frye et al | DANR | DANR by Frye et al |
| 41 Goldberg et al | ADIR and RSF and home video |  |
| 42 Jones et al | ADIR |  |
| 43 Kumar et al | ADIR and RSF | None disclosed |
| 44 Malek et al | ADIR | None disclosed |
| 45 Nordahl et al | ADIR | None disclosed |
| 46 Thurm et al Lord | ADIR and RVI | Lord |
| 47 D’Ardia et al | ADIR | None disclosed |
| 48 Luyster, Richler, Rogers, Lord et al | ADIR | Lord |
| 49 Molloy, Lord et al | ADIR | Lord |
| 50 Ozonoff and Iosif | ADIR |  |

Eight publications included an author involved with measure development.

Publications not available for data extraction

| Author/s, (Year of Publication) | Title and Journal |
| --- | --- |
| Amorosa, H; Noterdaeme, M (2002) | Early childhood autism: age at onset and early regression].  Zeitschrift fur Kinder- und Jugendpsychiatrie und Psychotherapie |
| Giroire, J.M (1984) | Acquired aphasia in children  Revue de Laryngologie Otologie Rhinologie |
| Volkmar, F R; Cohen, D J (1989) | Disintegrative disorder or "late onset" autism  Journal of child psychology and psychiatry, and allied disciplines |
| Kubota, Y; Tachimori, H; Osada, H; et al (2000) | A study of the early development of children with pervasive developmental disorders who show developmental regression as indicated by speech loss.  Seishin Igaku |
| Gaddour, N.; Zemzem, M.; Guedria, A. et al (2015) | Developmental regression in autism  European Child and Adolescent Psychiatry |
| Phillips, D.; Cho, Y.; Mulatya, C.; et al (2022) | Natural history of neurodevelopment in neuronopathic mucopolysaccharidosis type ii |
| Phillips, D.; Cho, Y.; Mulatya, C.; et al (2023) | Daily living skills on the Vineland Adaptive Behavioral Scale version 2 (VABS-II) in neuronopathic mucopolysaccharidosis type II (MPS II) |
| Soo, A. K. S.; Baker, E.; Maunder, P.; et al (2022) | Neurodegeneration with brain iron accumulation (NBIA) in UK children with progressive intellectual and neurological deterioration (PIND) |
| Soo, A. K. S.; Barwick, K.; Gorman, K.; et al (2023) | PLA2G6-Associated Neurodegeneration (PLAN): A Large, International Natural History Study |
| Abreu, N. J.; Khurho, Z.; Scherr, J.; et al (2022) | Onset and evolution of symptoms in CLN8 disease |
| Aslan, C.; Konuskan, B.; Sener, B.; et al (2018) | Clinical features and autoimmune variables associated with regression in autism spectrum disorders |
| De Somma, E; O'Mahony, J; Brown, R .; et al (2022) | Disrupted cognitive development following pediatric acquired demyelinating syndromes: a longitudinal study |
| Galvez, M.; Bello, S.; Garzon, E (2023) | Diagnostic yield of whole-exome sequencing in neuroregression in a Colombian cohort |
